# Supplementary material
Source: publisher site journal article supplement (https://www.degruyterbrill.com/publication/dbid/dlo/downloadAsset/DLO_DLO_Axel%20Frey_Vorwort--de.pdf)
Supplement: Supplementary file 1 [file DLO_DLO_Axel%20Frey_Vorwort--de.pdf]

Axel Frey

## Vorwort zur Datenbank

Die Online-Edition *Deutsche Literatur des 18. Jahrhunderts Online* macht viele Erstaussagen und historische Gesamtausgaben von 642 deutschsprachigen Autoren im Volltext zugänglich. In einzigartiger Weise bilden die 2.675 Werke in 4.494 Bänden einen repräsentativen Querschnitt durch das Textaufkommen der gesamten deutschsprachigen literarischen Aufklärung. Weit mehr als eine Million Buchseiten wurden für diese Edition digitalisiert.

Das 18. Jahrhundert ist zweifellos eine der interessantesten Epochen der deutschen Geistesgeschichte. Mit einer unglaublichen Vielfalt an literarischen und außerliterarischen Phänomenen macht es seinen Einfluss unterschwellig, aber durchaus wirkungsmächtig bis in die heutige Zeit hinein geltend. Vor allem dadurch entziehen sich viele Werke aus diesem Jahrhundert aller akademisch-chronologischen Zuordnung, weshalb der Untertitel „von der Frühaufklärung bis zur Spätaufklärung“ eher als Orientierungshilfe zu verstehen ist denn als exakte literarhistorische Epocheneinteilung. Zudem sah die editorisch-verlegerische Intention dieser Online-Edition die Aufnahme der wesentlichen Autoren aus der literarischen Klassik und der literarischen Frühromantik nicht vor.

Den Hauptbestand des Autoren- und Werkkanons, welcher der *Deutschen Literatur des 18. Jahrhunderts Online* zugrunde liegt, bildet die Mikrofiche-Edition *Bibliothek der Deutschen Literatur*. Dieser Kanon wurde gemeinsam mit dem Herausgeber Paul Raabe kritisch überarbeitet und um etliche Autoren und Werke ergänzt. Die *Deutsche Literatur des 18. Jahrhunderts Online* versteht sich also nicht allein als die Digitalisierung der vorhandenen Mikrofiche-Edition, sondern als deren Ergänzung und Fortsetzung auf breiterer bibliographischer Grundlage. So wurden neben den Ausgaben von gut 560 Autoren aus der *Bibliothek der Deutschen Literatur* die Werke von rund 80 Autoren, wie z. B. Adam Bernd, Johann Anastasius Freylinghausen, Friederike Lohmann, Magdalena Sibylle Rieger oder Gerhard Tersteegen, erstmalig aufgenommen. Darüber hinaus ermöglichten die immer besseren Recherchemöglichkeiten in Online-Katalogen die Ergänzung von einigen mehrteiligen, bislang unvollständig gebliebenen Werken wie Johann Martin Millers *Predigten für das Landvolk*, oder Marcus Herz' *Briefe an Aerzte*.

Auf der bibliographischen Grundlage des sogenannten „Taschengoedeke“ wurde die *Bibliothek der Deutschen Literatur* im Jahre 1988 von der Kulturstiftung der Länder ins Leben gerufen. Ihre Hauptaufgabe bestand damals darin, den relevanten Bestand des deutschen Literaturerbes zu konservieren und allgemein zugänglich zu machen. Die hier vorliegende Datenbank *Deutsche Literatur des 18. Jahrhunderts Online* nun trägt vor allem den sich rasant verändernden Lebens- und Arbeitsbedingungen in der Informationsgesellschaft Rechnung und bietet durch ihre Digitalisierung den individuellen, ganz direkten Zugang zu den Volltexten, womit auch den wechselnden Forschungsinteressen konzeptionell Rechnung getragen wird. Vor allem deshalb wurde

neben den Werken der führenden Vertreter der literarischen Aufklärung auch eine Vielzahl von *poetae minores* aufgenommen, deren Werke heute wieder in den Fokus der geisteswissenschaftlichen Forschung geraten, auch wenn ihnen meist nur eine regionale oder gar lokale Bedeutung eignet.

Obwohl die bibliographische Autorität des „Taschengoedeke“ längst nicht mehr unerschütterter ist, unaufklärbare Lücken aufweist und durchaus reich an offensichtlichen Fehlern und Widersprüchlichkeiten ist, bildet diese Bibliographie nach wie vor eines der wichtigsten, ja vertrautesten Hilfsmittel von Germanisten, Buchhändlern, Antiquaren und Bibliophilen. Deshalb war es Ende der 1980er Jahre eine pragmatische, genau überlegte Entscheidung des Literaturausschusses der Kulturstiftung der Länder und seines Vorsitzenden, Jan Philipp Reemtsma, sich für den im Jahre 1924 erschienenen „Taschengoedeke“ als Werkindex für die *Bibliothek der Deutschen Literatur* zu entscheiden. Zusammengestellt vom Arzt und Kulturhistoriker Leopold Hirschberg, folgt der „Taschengoedeke“ einem ausgesprochen weiten Literaturbegriff. Neben dichterischen Werken finden sich hier Texte aus praktisch allen Disziplinen. „Die deutsche Literatur von etwa 1650 an, ..., die Philosophie von Plato bis Nietzsche, ..., die Musikwissenschaft von Bach bis Robert Franz, Zahlloses aus den Grenzgebieten (Kulturgeschichte, Volkskunde, Theologie usw.) – all das wird man im *Taschengoedeke* in übersichtlicher, sofort verständlicher Anordnung finden ...“, so beschrieb Hirschberg den wesentlichen Inhalt seines bibliographischen Kompendiums. Dessen besondere Eigenart besteht aber nicht allein in der beschriebenen inhaltlichen Vielfalt, sondern gerade auch darin, dass es sich nicht um eine reine Erstausgabenbibliographie handelt, was als durchaus bereicherndes Element angesehen werden kann. Denn viele spätere, teilweise überarbeitete Auflagen oder Textfassungen sind hier verzeichnet, die von editionshistorischem Interesse sind.

Freilich hat den mittlerweile mehr als 15 Jahren an der *Bibliothek der Deutschen Literatur* arbeitenden Redakteurinnen und Redakteuren die bibliographische Arbeit mit dem „Taschengoedeke“ immer wieder ungewöhnliche Überraschungen geboten. Neben den schon oft diskutierten und aufgeführten Zitationsproblemen, die Leopold Hirschberg freimütig eingesteht, sind es vor allem die Autorenszuordnungen bestimmter Werke, die äußerst problematisch sein können. Zum Beispiel findet sich die von Anton Paul Ludwig Carstens im Jahre 1743 anonym herausgegebene Sammlung *Zeugnisse treuer Liebe nach dem Tode Tugendhafter Frauen in gebundener deutscher Rede abgestattet von ihren Ehemännern* kommentarlos Paul Gottlieb Werlhof zugeschrieben. Nicht weniger eigenartig ist die Zuordnung von zwei Werken unter die Verfasserschaft von Eulogius Schneider. Die im Jahre 1792 erschienene Biographie *Eulogius Schneiders Leben und Schicksale im Vaterlande* hat eigentlich Andreas Sebastian Stumpf verfasst, und Christoph Friedrich Cotta ist der wirkliche Autor des Werkes *Eulogius Schneider's* [sic!] ... *Schicksale in Frankreich*, welches 1797 erschien. In solchen und vielen anderen Fällen musste bibliographisch häufig recht aufwendig recherchiert werden, um den tatsächlichen Autor oder Herausgeber zu ermitteln und in die Werkaufnahme zu integrieren.

In der Online-Datenbank werden alle Werke als digitale Faksimiles präsentiert. Es ist ein zentrales verlegerisches Anliegen, dass die Volltexte vom Nutzer zugleich durchsucht und rezipiert werden können. Dafür wurde eine spezielle Bearbeitungssoftware entwickelt und eine ausgezeichnete Fraktur-Texterkennung eingesetzt, die oft staunenswerte Resultate brachte. Dennoch muss darauf hingewiesen werden, dass in Einzelfällen der teilweise sehr kritische Zustand der Originalvorlagen keine einwandfreie Texterkennung zuließ.

Zu allen Texten wurden in jedem Fall systematische Zugänge geschaffen. Existierten Inhaltsverzeichnisse in den Werken selbst, wurden diese wiedergegeben. Bei der Mehrzahl der Werke war das aber nicht der Fall, so dass Inhaltsverzeichnisse und Kapitelübersichten redaktionell erstellt werden mussten, um den Textkorpus für den Benutzer strukturell zu erschließen. Zu diesem Zweck wurden in den wenigen Monaten der Bearbeitungszeit Tausende von Einzelbänden virtuell durchgeblättert, um Gedicht- oder Kapitelanfänge, die Überschriften von Abhandlungen, Schriften und Aufsätzen, aber auch den Beginn der Aufzüge aller Schauspiele zu markieren und systematisch anzulegen. Nur dadurch wurde es möglich, dem Nutzer gezielte Suchmöglichkeiten anzubieten, die eine schnelle Orientierung auch innerhalb einzelner Werke erlauben.

Die digitalen Volltextwiedergaben erlaubten nun auch gründliche redaktionelle Autopsieprüfungen. Auf Lücken und Fehlseiten wurde hingewiesen, aber auch in Anhängen versteckte eigenständige Textbeiträge konnten ermittelt und bibliographiert werden. Dazu kommen, wo immer möglich, Hinweise auf versteckte Bibliographien oder Bemerkungen zu literarischen Kontexten wie „Werther-Literatur“ oder „Fragmentestreit (Anti-Goeze)“.

Eine der wesentlichsten Bereicherungen für die Nutzung der Datenbank besteht in dem Versuch, jedem Werk eine Gattung und/oder die Editionsform (Zeitschrift, Almanach, Taschenbuch usw.) zuzuordnen. Die aufgenommenen Bände sind so auch über eine Gattungssystematik erschließbar. Allerdings ist die Begrifflichkeit, akademische Kontroversen beweisen es, nicht einheitlich. Bei der redaktionellen Bearbeitung wurde schnell deutlich, dass auch hier der ausgesprochen weite Hirschberg'sche Literaturbegriff eine stark beeinflussende Rolle spielt. Jeder, der sich mit der regelrecht ausufernden Literaturproduktion und -rezeption besonders in der zweiten Hälfte des 18. Jahrhunderts auskennt, weiß um die Schwierigkeiten, denen sich ein um Systematik und Einordnung bemühter Literaturwissenschaftler hier gegenüberstellt. So finden sich Texte, die heutiger Begrifflichkeit nach durchaus als „psychologisch“ oder „soziologisch“ klassifiziert werden könnten, was sich angesichts historischer Inhalte verbietet. Auch bei den zahlreich vorkommenden Gedichtausgaben waren Einzelgenres oft gar nicht alle aufzählbar. Ganz zu schweigen von der Vielzahl an Texten für gehobene Unterhaltung, wie sie in Wochenschriften oder Almanachen verbreitet wurden. Hier blieb zur Beschreibung manchmal nur der sicher anfechtbare Begriff der „popularphilosophischen Reflexion“. Die Häufigkeit, mit der dazu gegriffen wurde, macht deutlich, dass unser Vorgehen in diesem weiten Feld oft nur deskriptiver Natur sein konnte.

Schließlich kann zu jedem Autor und jeder Autorin ein kurzer biographischer Artikel abgerufen werden, der entweder aus einem einschlägigen Literaturlexikon übernommen oder eigens für die Datenbank verfasst worden ist. Namensvarianten und Pseudonyme, die für die bibliographische Recherche von einiger Bedeutung sind, wurden in der Regel angegeben.

An dieser Stelle darf der herzliche Dank für das Entgegenkommen fast aller Bibliotheken nicht fehlen, die teilweise schon seit 1989 durch großzügig gehandhabte Ausleihbedingungen an der *Bibliothek der Deutschen Literatur* mitarbeiten. Denn auch die Redaktionsarbeit an der *Deutschen Literatur des 18. Jahrhunderts Online* erforderte wieder denkbar viel Entgegenkommen, unkomplizierte Unterstützung und eine gewisse Großzügigkeit. Das ist bei der Bewältigung des immer schwieriger werdenden Alltages in unseren Bibliotheken wirklich keine Selbstverständlichkeit und bedarf in jedem Falle besonderer Erwähnung. Jede leihgebende Bibliothek ist in der bibliographischen Titelaufnahme aufgeführt.

Mit der *Deutschen Literatur des 18. Jahrhunderts Online* ist eine hochwertige Forschungsdatenbank entstanden, die sowohl für Literatur- und Sprachwissenschaftler als auch für jede weitere geisteswissenschaftliche Disziplin, aber natürlich auch für Studierende und alle literarisch Interessierten einzigartige Möglichkeiten der Recherche und Rezeption bietet. Damit steht eine der bislang umfassendsten digitalen Bibliotheken zur Verfügung, die zwar nicht das „utopische Ganze“ des Literaturerbes des 18. Jahrhunderts bietet, „so doch nicht weniger als ein durchaus großes Ganzes in einer besonderen Form“ (Hans Wollschläger in einem Vortrag zur Einführung der *Bibliothek der Deutschen Literatur*).

Axel Frey

Leipzig, im August 2007
